# Supplementary material
Source: HighWire-hosted journal article supplement (https://drc.bmj.com/content/4/1/e000217)

**Supplementary figure 1:** The prevalence of FINDRISC  $\geq 15$  by sex and age groups.

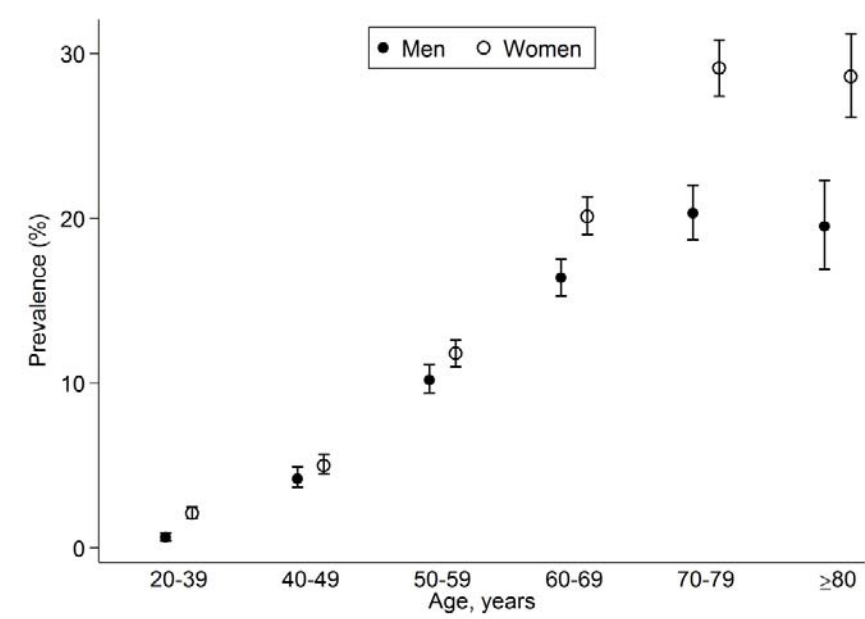

Supplement: inline-supplementary-material-2 [file inline-supplementary-material-2.pdf]
